# Supplementary material
Source: Elsevier journal article supplement (https://www.sciencedirect.com/science/article/pii/S2173574322001174)
Supplement: mmc1 [file S2173574322001174:mmc1.pdf]

**Tabla suplementaria 1.** Conocimientos de los pacientes sobre la gota, síntomas, signos y duración del ataque

| Categorías                                                         | Subcategorías                             | Citas                                                                                                                                                                                                                                                                                                                                                                                                                                                                                                                                                                                                                                                                                                                                                                                                        |
|--------------------------------------------------------------------|-------------------------------------------|--------------------------------------------------------------------------------------------------------------------------------------------------------------------------------------------------------------------------------------------------------------------------------------------------------------------------------------------------------------------------------------------------------------------------------------------------------------------------------------------------------------------------------------------------------------------------------------------------------------------------------------------------------------------------------------------------------------------------------------------------------------------------------------------------------------|
| <b>1. Conocimientos de la gota. Experiencia con el diagnóstico</b> | <b>1.1 Causas de la gota</b>              | <p><i>Bueno, yo pienso que la gota viene por un exceso de grasas, embutidos y cosas que no tienes que comer...También herencia, mi hermano también la tuvo. (P2, H, 72 años, GF3)</i></p> <p><i>A mi padre toda la vida lo he visto gotoso. Yo no soy de comer nada extraordinario y beber alcohol, no bebo nada en absoluto. Supongo que quizás es un poco de herencia. (P4, M, 52 años, GF2)</i></p> <p><i>Tengo entendido que el ácido úrico lo tenemos todos, pero nosotros tenemos demasiado. (P3, H, 55 años, GF1)</i></p>                                                                                                                                                                                                                                                                             |
|                                                                    | <b>1.2. Desencadenantes del ataque</b>    | <p><i>La gota es un poco por la comida. El alcohol también afecta a que suba el ácido úrico. En mi caso era excederse un poco y me notaba el tobillo hinchado. (P3, H, 68 años, GF3)</i></p> <p><i>Yo diría que tiene que ver con los hábitos. Cuando te ponen mucho marisco a las dos semanas volvía a tener ataque. La cerveza también tiene unos componentes. Eso, cada día, seguramente es lo que me lo provocaba. (P1, H, 84 años, GF3)</i></p> <p><i>A mí las berzas, la coliflor, las espinacas, el embutido, no las puedo tocar. Una vez que las toco, ya estoy con la gota.( P4, H, 56 años, GF1)</i></p> <p><i>Los dulces, los dulces también lo he notado mucho. Yo lo he notado mucho, mucho! (P9, M, 79 años, GF1)</i></p> <p><i>La causa no es la alimentación. (P11, H, 37 años, GF1)</i></p> |
|                                                                    | <b>1.3 Experiencia con el diagnóstico</b> | <p><i>Pensaba que tenía la rodilla fastidiada, porque se me hinchaba. Me hicieron una resonancia, pensaban que tenía una sinovitis. En la artroscopia empezó a salir un polvo blanco que era ácido úrico. Tenía tofos. (P1, H, 58 años, GF2)</i></p> <p><i>Tenía dolor y llamé a la doctora de cabecera. Vino y me envió en ambulancia al hospital. No veían qué era...Me hicieron analíticas y me dijeron que tenía gota. (P4, M, 52 años, GF2)</i></p>                                                                                                                                                                                                                                                                                                                                                     |
| <b>2. Síntomas y signos. Duración del ataque</b>                   | <b>2.1 Síntomas y signos</b>              | <p><i>Se notaba un dolor en el pie, que vamos! Esto es para tenerlo, para saber lo que es! Y malestar...(P5, H, &gt;70 años, GF3)</i></p> <p><i>Tuve mucho dolor...Se me puso la mano muy hinchada.(P3, H, 55 años, GF1)</i></p>                                                                                                                                                                                                                                                                                                                                                                                                                                                                                                                                                                             |
|                                                                    | <b>2.2 Duración del ataque</b>            | <p>VARIOS PARTICIPANTES: A veces una semana, a veces 3 o 4 días, dos, tres días. Si era más fuerte te duraba más tiempo.</p>                                                                                                                                                                                                                                                                                                                                                                                                                                                                                                                                                                                                                                                                                 |

**Tabla suplementaria 2. Efectos de la gota en la vida diaria. Gota y otras enfermedades**

| Categoría                        | Códigos                                              | Citas                                                                                                                                                                                                                                                                                                                                                                                                                                                                                                                                                                                                                                                                                                                                                                                                                                                                                                                                                                                                                                                                                                                                                                                                                                                                                               |
|----------------------------------|------------------------------------------------------|-----------------------------------------------------------------------------------------------------------------------------------------------------------------------------------------------------------------------------------------------------------------------------------------------------------------------------------------------------------------------------------------------------------------------------------------------------------------------------------------------------------------------------------------------------------------------------------------------------------------------------------------------------------------------------------------------------------------------------------------------------------------------------------------------------------------------------------------------------------------------------------------------------------------------------------------------------------------------------------------------------------------------------------------------------------------------------------------------------------------------------------------------------------------------------------------------------------------------------------------------------------------------------------------------------|
| <b>Efectos en la vida diaria</b> | <b>A nivel físico</b>                                | <p>Un dolor horroroso. El primer ataque estuve un mes y medio en una silla de ruedas sin poder dar un paso. Unos dolores tremendos. (P4, M, 52 años, GF2)</p> <p>Como si fuera un vidrio. No lo doblas. Te quedas bloqueado y arrastras la pierna. De una rodilla a otra había 3 cm de diferencia. (P5, H, 70 años, GF2)</p> <p>Una vez me duró 15 días y de los 15 días, 10 estuve a la cama, que no me podía ni mover. Iba al lavabo, que está a cinco metros, con muletas. (P3, H, 44 años, GF2)</p> <p>No es para estar ni con los amigos, porque estas que rabias. Estas en casa y sin moverte eh!, sin moverte. (P9, M, 79 años, GF1)</p> <p>No puedo salir, voy cojeando. Aunque ya tengo 83 años, me sabe mal que me vean cojeando. Duele mucho, lo mejor es estar en reposo. (P12, H. 83 años, GF1)</p> <p>Se convierte en una aventura el levantarte por la mañana e ir a ducha. No es cómodo estar de pie. Intentas economizar al máximo gesto. Yo me levanto y en el trayecto intento hacerlo todo lo que puedo hacer, dejar esto, el recoger lo otro, que tal, el teléfono, ir al baño, vuelvo me siento oye no me molestéis ... (P11, H. 37 años, GF1)</p>                                                                                                                            |
|                                  | <b>A nivel psicológico</b>                           | <p>Yo tenía un trabajo para toda la vida. Que con 39 años te digan que esto no lo puedes hacer, moralmente y anímicamente te hunde. Tienes que buscar otras alternativas para sobrevivir. (P4, M, 52 años, GF2)</p> <p>El humor te cambia. No es que quieras hacerles pagar la mala uva a la familia, pero inconscientemente pagas el mal humor del dolor con los que tienes al lao. Lo haces inconscientemente, porque a lo mejor te dan un pequeño golpe en el pie o eso y estas que saltas. (P5, H, 67 años, GF1)</p> <p>...te cambia el carácter. A mí lo que me pone de mal carácter, más que en sí el dolor, es ir con los amigos y no poder comer callos. (P10, H, 57 años, GF1)</p>                                                                                                                                                                                                                                                                                                                                                                                                                                                                                                                                                                                                         |
|                                  | <b>A nivel familiar, social y laboral</b>            | <p>Yo llevaba los nietos al colegio. Iba y los traía y los llevaba igual. Aguantaba el dolor. (P4, M. 76 años, GF3)</p> <p>Una vez me duró 15 días, 10 días en la cama, sin moverme. Iba con muletas al lavabo -5 metros-. En aquel tiempo estaba en el paro, si no... fatal. (P3, H, 44 años, GF2)</p> <p>A mí en el trabajo sí que me afectó. Lo tuve que dejar, porque eran doce horas de pie. (P4, M, años, GF2):</p> <p>Yo, excepto una vez que me quedé en casa, las demás he aguantado trabajando sin aflojar. Yo no había sido nunca de baja. (P5, H, 70 años, GF2)</p> <p>Creo que cuando te quedas bloqueado, ni puedes ir a trabajar, ni puedes hacer deporte, ni puedes salir a andar con tu familia. (P2, H, 59 años, GF2)</p> <p>No poder trabajar, la familia atada a tu problema. Si quieres ir de vacaciones no puedes, no puedes salir con los amigos. (P2, H, 59 años, GF2)</p> <p>Cojeando desde los 25 años. Cuando me ha venido un ataque, como soy autónomo y transportista, me he ido a urgencias. Me han pinchado un antiinflamatorio. El día siguiente ya estaba trabajando. (P2, H, 48 años, GF1)</p> <p>A nivel social no, pero a nivel laboral, una persona que tenga que coger la baja constantemente, según en que empresa puede afectar. (P10, H, 57 años, GF1)</p> |
|                                  | <b>Cambios en el estilo de vida</b>                  | <p>A mí me gusta todo lo que va mal para el ácido úrico. Si todo lo que te gusta hace daño, es difícil dejarlo todo. (P2, 59 H, años, GF2)</p> <p>Es muy difícil vigilar siempre. A veces dices, tomo una cerveza o lo que sea, porqué con las pastillas estoy bien. Está en mí y no puedo hacer nada. Mi cuerpo provoca, estas anomalía. Hacer una vida monacal con la comida y el beber, creo que no compensa, siempre y cuando médicamente estés controlado. (P1, H, 58 años, GF2)</p> <p>Si fueran cosas muy puntuales sería fácil de llevarlo a cabo, pero cuando hace tantos años y no solo lo pagas tú, sino que lo paga la familia, llega un momento que en las cosas básicas más o menos vamos haciendo bondad, pero las cosas que no son tan básicas haces de más o de menos porque sino... (P10, H, 57 años, GF1)</p>                                                                                                                                                                                                                                                                                                                                                                                                                                                                    |
|                                  | <b>Variabilidad según las personas y su contexto</b> | <p>Depende de las circunstancias. Tengo trabajadores. Yo voy a trabajar, aunque sea a la pata coja, aunque me tengan que ir a buscar a casa con el coche. (PACO, H, 68 años, GF3)</p> <p>Todas las limitaciones son una putada a nivel social. También depende del carácter y de la predisposición a decidir entre -prefiero el abstenerme y no sufrir el trance o me da igual y ya pasaré el trance-. Al final es un poquito como cada cual es capaz de negociar sus limitaciones, impuestas o propias. (P11, H, 37 años, GF1)</p>                                                                                                                                                                                                                                                                                                                                                                                                                                                                                                                                                                                                                                                                                                                                                                 |
| <b>Gota y otras enfermedades</b> |                                                      | <p>Yo no había ido a un médico nunca, nunca, hasta que me he jubilado. Me dijeron que tenía la tensión, y después de la tensión, el ácido úrico. (P7, H, 74 años, GF3)</p> <p>Siempre he tenido los parámetros bastante disparados. El colesterol, el azúcar. El nivel del ácido úrico lo tenía también elevado, pero la médica, no le daba importancia. No había tenido nunca ningún ataque de lo que se entiende como ataque de gota, de dolor... (P1, H, 58 años, GF2)</p> <p>Yo tengo una nefropatía crónica. Según me dijeron, venía de tantos antiinflamatorios que había llegado a tomar por la gota. Cuando tenía dolor, tomaba antiinflamatorios y ibas tirando. (P4, M, 52 años, GF2)</p> <p>A mí no me da la impresión de que vaya a repercutir en nada más. No sé si lo que lo provoca la gota es que tengo el riñón mal, o el riñón mal y hace que tenga gota, no lo sé. Pero que me vaya a repercutir en el corazón o en cualquier cosa, no. (P12, H. 83 años, GF1)</p>                                                                                                                                                                                                                                                                                                               |

**Tabla Suplementaria 3. Tratamiento farmacológico y medidas no farmacológicas**

|                                                                 |                                                               |                                                                                                                                                                                                                                                                                                                                                                                                                                                                                                                                                                                                                                                                                                                                                                                                                                                                                                                                                                                                                                                                    |
|-----------------------------------------------------------------|---------------------------------------------------------------|--------------------------------------------------------------------------------------------------------------------------------------------------------------------------------------------------------------------------------------------------------------------------------------------------------------------------------------------------------------------------------------------------------------------------------------------------------------------------------------------------------------------------------------------------------------------------------------------------------------------------------------------------------------------------------------------------------------------------------------------------------------------------------------------------------------------------------------------------------------------------------------------------------------------------------------------------------------------------------------------------------------------------------------------------------------------|
| <b>4. Tratamiento farmacológico y medidas no farmacológicas</b> | <b>4.1 Fármacos para el tratamiento de los ataques</b>        | Con unas pastillas en poco tiempo me desapareció. Como de todo, menos pescado azul. No me gusta. (P6, H, 60 años, GF2)<br>Yo he ido al médico y me han dicho, cuando tienes el ataque de gota no tomes el alopurinol. Te lo quitan. Sin embargo otros médicos dicen - no lo dejes de tomar, te lo tienes que tomar cada día- ¿A quién le haces caso? (P4, H, 56 años, GF1):                                                                                                                                                                                                                                                                                                                                                                                                                                                                                                                                                                                                                                                                                        |
|                                                                 | <b>4.2 Fármacos para el tratamiento de base y sus efectos</b> | ¿Por qué tengo que tomar pastillas? Realmente no me acuerdo. y dices -me las estoy tomando, sin dolerme pero por si acaso-. (P6, H, 83 años, GF3)<br>El reumatólogo me puso la medicación preventiva (alopurinol). Me comentó que podía tener un ataque fuerte si no iba con cuidado con el Alopurinol. A los 6 meses, había bajado el ácido úrico, pero se tenía que reforzar el tractamiento, porque tenía bastantes tofos. (P1, H, 58 años, GF2)<br>Yo tomo Adenuric desde hace un par de años. Antes había tomado Zyloric. Con el primer ataque Colchicina. (P4, M, 52 años, GF2)<br>El alopurinol me dijeron que se tenía que dejar. La colchicina me la sacó el reumatólogo hace una semana. Ahora tengo Voltaren. (P5, H, 70 años, GF2)<br>Al principio me daban tres clases de pastillas y no me hacían nada. El el Adenuric me ha ido bien. Hace tiempo que no me ha vuelto a dar el ataque. (ISABEL, M, años, GF1)<br>Me cambiaron al Adenuric. Tomo media cada día y no tengo ataques. A veces tomo algo de alcohol, cervezas.... (P2, H, 48 años, GF1) |
|                                                                 | <b>4.3 Beneficios del tratamiento y preferencias</b>          | Desde que empecé, el tratamiento no he tenido ningún ataque. (P3, H, 44 años, GF2)<br>Tomando la medicación, casi puedo comer de todo. Es el mejor, creo que he visto el cielo, con esta pauta. (P2, H, 59 años, GF2)<br>La doctora me recomendó hacer una dieta estricta, y le dije-dame más pastillas, lo prefiero-El día que se me dispare todo, haré un otra planteamiento de vida, pero ahora mismo lo que estoy tomando es preventivo. (P1, H, 58 años, GF2)<br>Yo creo que la evolución del tratamiento de la gota ha sido radical de hace diez años o quince hacia aquí. La experiencia es que ahora puedo comer de todo, tomando los medicamentos . (P2, H, 59 años, GF2)<br>El Adenuric es fantástico. Hace un año que no tengo ataques. (P10, H, 57 años, GF1)                                                                                                                                                                                                                                                                                          |
|                                                                 | <b>4.4 Preocupaciones sobre tratamiento farmacológico</b>     | Yo tengo completamente prohibidos los antiinflamatorios. (P4, M, 52 años, GF2)<br>En mi caso la analítica siempre había sido normal. En la última, el colesterol se ha ido un poco hacia arriba. Quería, ver si hay alguna relación. Tampoco sé si viene por eso o por otras causas. Con no tener ataques ya me conformo. (P3, H, 44 años, GF2)                                                                                                                                                                                                                                                                                                                                                                                                                                                                                                                                                                                                                                                                                                                    |
|                                                                 | <b>4.5 Adherencia al tratamiento</b>                          | Una pastilla pequeñilla, todos los días no me falta, esté fuera, esté dentro o donde sea. Voy fenomenal. (P4, M, 76 años, GF3)<br>Si te pautan una medicación y tú pasas o la dejas y comes lo que no tienes que comer, no hay efecto. Para que haya efecto hay que buscar el equilibrio con la pauta de tratamiento. Hacer el ying i el yang. (P2, H, 59 años, GF2)<br>Esto es de por vida. La pastillita la tomo, porque el dolor no lo quiere nadie. Tampco quiero hacer dieta siempre. El problema es del riñón. (P3, H, 55 años, GF1)<br>Si ves que te viene esto, no te gusta tomar medicinas, pero te las tomas. (P8, M, 72 años, GF1)                                                                                                                                                                                                                                                                                                                                                                                                                      |
|                                                                 | <b>4.6 Medidas no farmacológicas</b>                          | Yo quito la piel al tomate. Al principio probé con homeopatía. No me hacía nada. (P4, M, 52 años, GF2)<br>Lo que va bien el pie en alto y hielo. (P9, M, 79 años, GF1)<br>El hielo, alivia mucho. Si te pones un trapo y te pones hielo encima alivia mucho. (P7, M, 72 años, GF1)<br>Las alcachofas, me bebo el agua de las alcachofas. (P3, H, 55 años, GF1)<br>Si vas a un herbolario, te dicen que es del riñón y te dan unas hierbas para el riñón. (P6, H, 60 años, GF2)                                                                                                                                                                                                                                                                                                                                                                                                                                                                                                                                                                                     |

#### Tabla suplementaria 4. Información de los profesionales y visión de la sociedad

|                                           |                                                                             |                                                                                                                                                                                                                                                                                                                                                                                                                                                                                                                                                                                                                                                                                                                                                                                                                                                                                                                                                                                                                                                                                                                                                                                                                                                                                                                                                                                                                                                                                                  |
|-------------------------------------------|-----------------------------------------------------------------------------|--------------------------------------------------------------------------------------------------------------------------------------------------------------------------------------------------------------------------------------------------------------------------------------------------------------------------------------------------------------------------------------------------------------------------------------------------------------------------------------------------------------------------------------------------------------------------------------------------------------------------------------------------------------------------------------------------------------------------------------------------------------------------------------------------------------------------------------------------------------------------------------------------------------------------------------------------------------------------------------------------------------------------------------------------------------------------------------------------------------------------------------------------------------------------------------------------------------------------------------------------------------------------------------------------------------------------------------------------------------------------------------------------------------------------------------------------------------------------------------------------|
| <b>5. Información sobre la enfermedad</b> | <b>5.1 Percepciones sobre la información aportada por los profesionales</b> | <p>La reumatóloga me quiso explicar lo que era, pero por encima. Siempre es bueno saber un poco más de las enfermedades, porque pueden ser provocadas o que te puede salir. Fue una explicación por encima, no una cosa detallada. (P3, H, 68 años, GF3)</p> <p>Yo creo que lo hacéis bien. Estuve muy bien atendido. No tengo ninguna queja. Si encontráis cosas nuevas, que puedan reducir todo esto, genial. (P6, H, 60 años, GF2):</p> <p>Ha sido positiva la información. Tengo información del momento, no se me esconde nada. Yo estoy contento de la información, porque me está sirviendo para vivir mejor. (P2, H, 59 años, GF2)</p> <p>No tenemos información sobre el pronóstico. Nos dicen lo prohibido y ya está. Los efectos de los medicamentos me interesan mucho porque he tenido algún problema bastante grave. (P10, H, 57 años, GF1)</p> <p>Yo últimamente no he querido saber lo que conlleva, el ácido úrico con otras enfermedades. Si miras mi panfleto, tengo una quiniela. Tengo cáncer y se ha reproducido. Sé que la quimioterapia y la radioterapia afectan a la inmunidad. Yo creo que cada persona eh! debería, debe saber lo que quiera. (P4, H, 57 años, GF1)</p> <p>Supongo, en cierta forma, tal vez es una de las tareas cotidianas del médico, captar hasta qué punto el paciente recibe bien tener tanta información, porque hay gente que depende lo que digas se pone tan sumamente nerviosa que puede ser contraproducente. (P11, H, 37 años, GF1)</p> |
|                                           | <b>5.2 Información sobre alimentación y bebidas</b>                         | <p>A mí me dijeron, llevar un régimen, quitarme el conejo, las grasas y andar. (P8, M, 72 años, GF1)</p> <p>A cada uno le dicen una cosa distinta. A uno le dicen los espárragos no y a otros la carne roja no. (P12, H, 83 años, GF1)</p> <p>A mí me dieron un tríptico que indicaba que estaban prohibidas las carnes rojas el alcohol, y el pescado azul, marisco y todo eso.... (P10, H, 57 años, GF1).</p> <p>Donde la enfermera había tres listas: lo que no puedes y lo que sí, y lo que solo de vez en cuando. (P4, H, 57 años, GF1):</p>                                                                                                                                                                                                                                                                                                                                                                                                                                                                                                                                                                                                                                                                                                                                                                                                                                                                                                                                                |
|                                           | <b>5.3 Información identificada por las personas participantes</b>          | <p>La doctora de cabecera me indicó las prohibiciones de los alimentos. Después “chafardeando” en Internet me explica todo lo que quieras y más. Remedios, también remedios caseros para rebajar esto. A mí, cuando me dijo la doctora por primera vez, que tengo ácido úrico y que eso provoca la gota y tal, yo me quedo “pues bueno, tengo ácido úrico”. No puedes hacer demasiado caso porque en internet no es información desinteresada como la de los servicios médicos. Cada uno está mirando sus intereses. (P1, H, años, GF3)</p> <p>Mi búsqueda en la red, no es encontrar el medicamento que me va bien, es para saber qué puedo comer y beber y que no. (P2, H, 59 años, GF2):</p> <p>Hombre, el doctor Google, pues, en principio no sé si funciona o no funciona, pero te lo miras. (P1, H, 58 años, GF2)</p> <p>He buscado y te dice lo que se puede comer y lo que no se puede comer. Si miras no puedes comer de nada, de nada. (P5, H, 67 años GF1):</p> <p>Yo he encontrado alguna lista incompatible con otra. Una te dice “el café va bien” y en otra te dice que no va bien. (P2, H, 48 años, GF1)</p> <p>Prefiero no buscar porque no me acabo de fiar. Es decir, que sepa que la fuente se correcta y la información de calidad. (P11, H, 37 años, GF1)</p>                                                                                                                                                                                                             |
| <b>6. Visión de la sociedad</b>           | <b>6.1 Percepción de culpabilidad</b>                                       | <p>Yo entono el “mea culpa”. Si mantienes el equilibrio y la pauta del médico es adecuada, hace 15 meses que no he tenido un ataque. (P2, H, 59 años, GF2)</p> <p>Estas cocinando, vas picando y te das cuenta que aquello no lo puedes comer, pero por una vez y así cada día. Mi marido, cuando me da el ataque dice-¡estas cosas no las puedes comer! Encima del dolor, bronca. (P9, M, 79 años, GF1)</p> <p>Es que esto es, no tendrías que beber vino, no tendrías que comer chorizo, no tendrías que picar aunque sea poco. (P8, M, años, GF1)</p> <p>Piensen que podemos evitar el ataque evitando los excesos. (P12, H, 83 años, GF1). Te machacan. (P3, H, 55 años, GF1)</p> <p>Es algo que puedes evitar. Sino lo has evitado, es que algo no lo has hecho bien. (P6, H, 60 años, GF1)</p> <p>Yo diría que la gente piensa -mira este, la gota, como una cosa despectiva. Este bebe o come como un cerdo. Esta es mi percepción. (P2, H, 59 años, GF2)</p>                                                                                                                                                                                                                                                                                                                                                                                                                                                                                                                             |
|                                           | <b>6.2 Percepción de poca severidad</b>                                     | <p>No, no es una enfermedad peligrosa...Se entiende que estás sufriendo un dolor importante pero pasajero y no induce a mayores peligros. (P3, H, 68 años, GF3)</p> <p>A mucha gente le suena como una enfermedad, una dolencia, completamente superada. (P11, H, 37 años, GF1)</p> <p>La gota es de ricos, pero yo tengo la enfermedad de los ricos y el bolsillo de los pobres. (P10, H, 57 años, GF1)</p>                                                                                                                                                                                                                                                                                                                                                                                                                                                                                                                                                                                                                                                                                                                                                                                                                                                                                                                                                                                                                                                                                     |
|                                           | <b>6.3 Actitud de comprensión y apoyo</b>                                   | <p>Depende de las empresas o de las personas. Siempre depende de las personas. Si la persona que tienes delante ha tenido algún problema o sabe que es, lo entiende. (P10, H, 57 años, GF1)</p> <p>A mí me cuidaban al máximo. Depende de la familiaridad, de lo acostumbrados que estén al contacto con aquello. Es relativo, si te conocen y tú has insistido en que tienes que hacer dieta, entonces ya te hacen más caso. (P11, H, 37 años, GF1)</p>                                                                                                                                                                                                                                                                                                                                                                                                                                                                                                                                                                                                                                                                                                                                                                                                                                                                                                                                                                                                                                         |
